# Supplementary material
Source: PubMed Central journal article supplement (PMC3486800)
Supplement: supp_pp.112.200386_200386suppfigs.pdf [file supp_pp.112.200386_200386suppfigs.pdf]

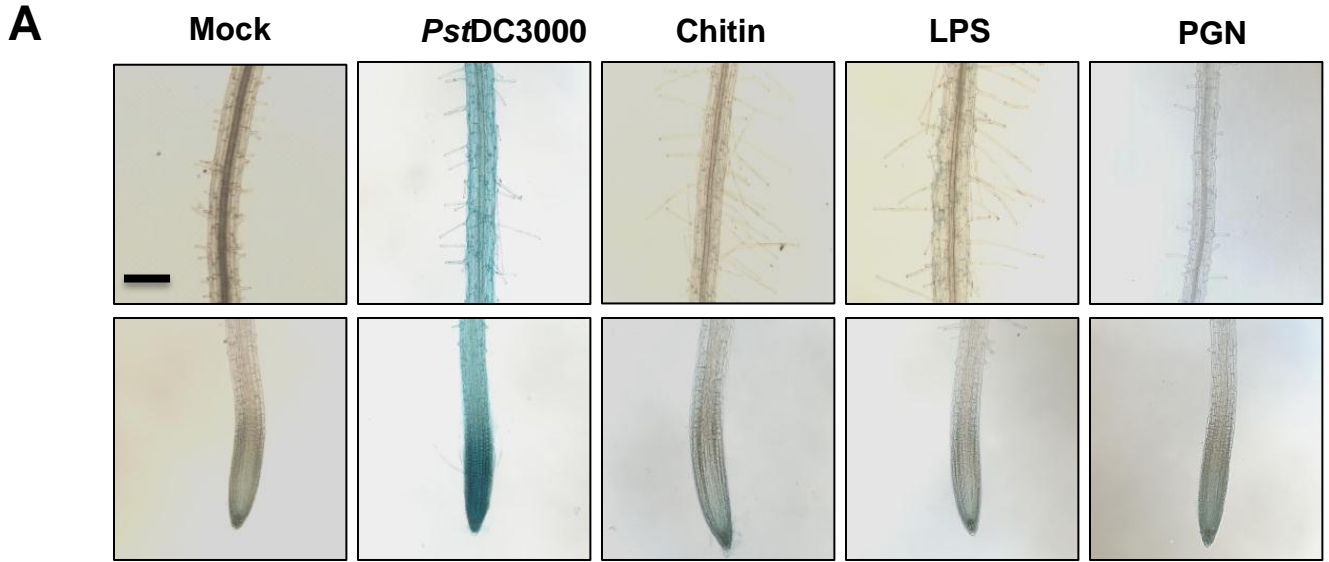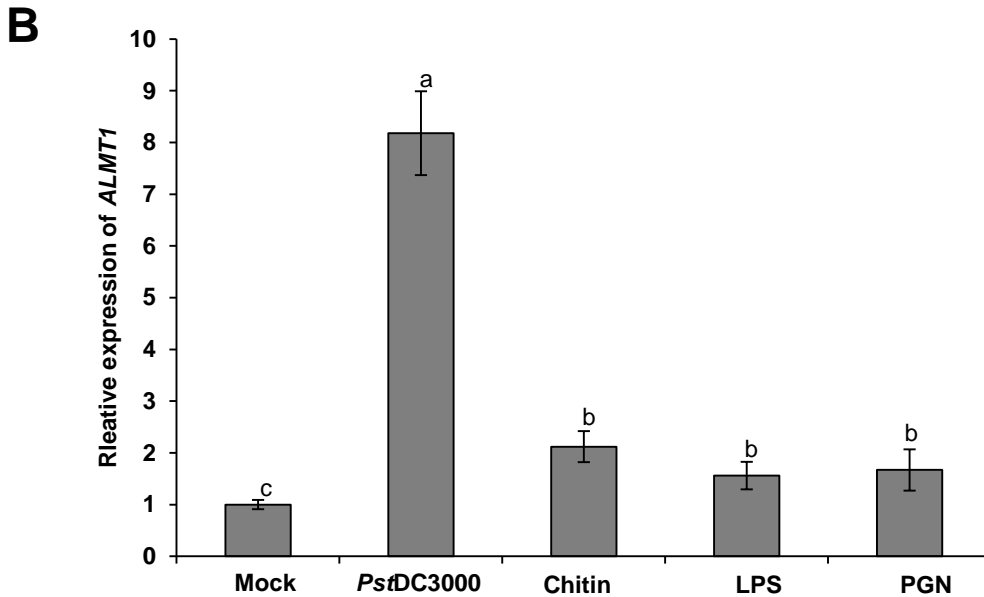

**Supplementary Figure 1: (A)** Three-week-old *in vitro* grown transgenic seedlings carrying *ALMT1*<sub>pro</sub>:*GUS* promoter were foliar sprayed with LPS (500  $\mu\text{g mL}^{-1}$ ), chitin (500  $\mu\text{g mL}^{-1}$ ), PGN (500  $\mu\text{g mL}^{-1}$ ), an equal volume of water (mock control) or *Pst*DC3000 (OD<sub>600</sub>=0.1). GUS staining of *ALMT1*<sub>pro</sub>:*GUS* seedlings were performed 24 h post-treatment. Scale bars: 4 mm, common to all panels. **(B)** Measurement of *ALMT1* expression in the roots of plants foliar sprayed with MAMPs: LPS (500  $\mu\text{g mL}^{-1}$ ), chitin (500  $\mu\text{g mL}^{-1}$ ), PGN (500  $\mu\text{g mL}^{-1}$ ), an equal volume of water (mock control) or *Pst*DC3000 (OD<sub>600</sub>=0.1). Total RNA was isolated and semi-quantitative RT-PCR performed. Lower case letters indicate the statistical significance among different treatments according to DMRT at  $p \leq 0.05$ , (SE values are three technical replicates of one experiment, repeated twice with similar results).

A

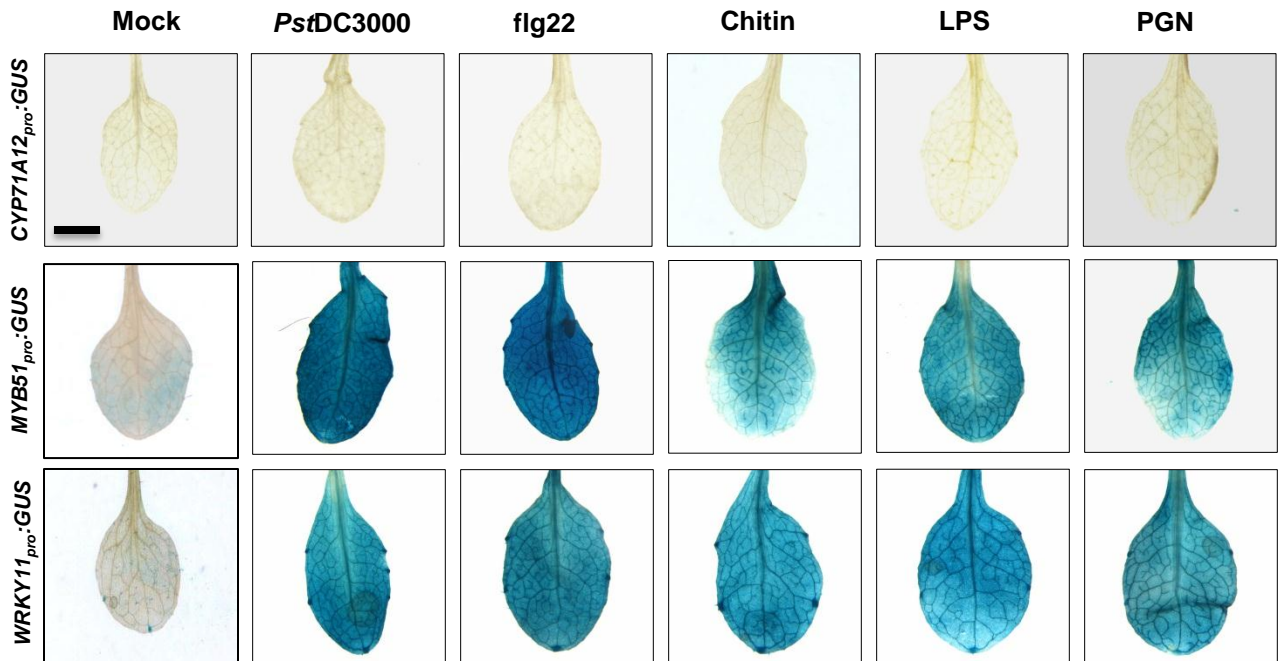

B

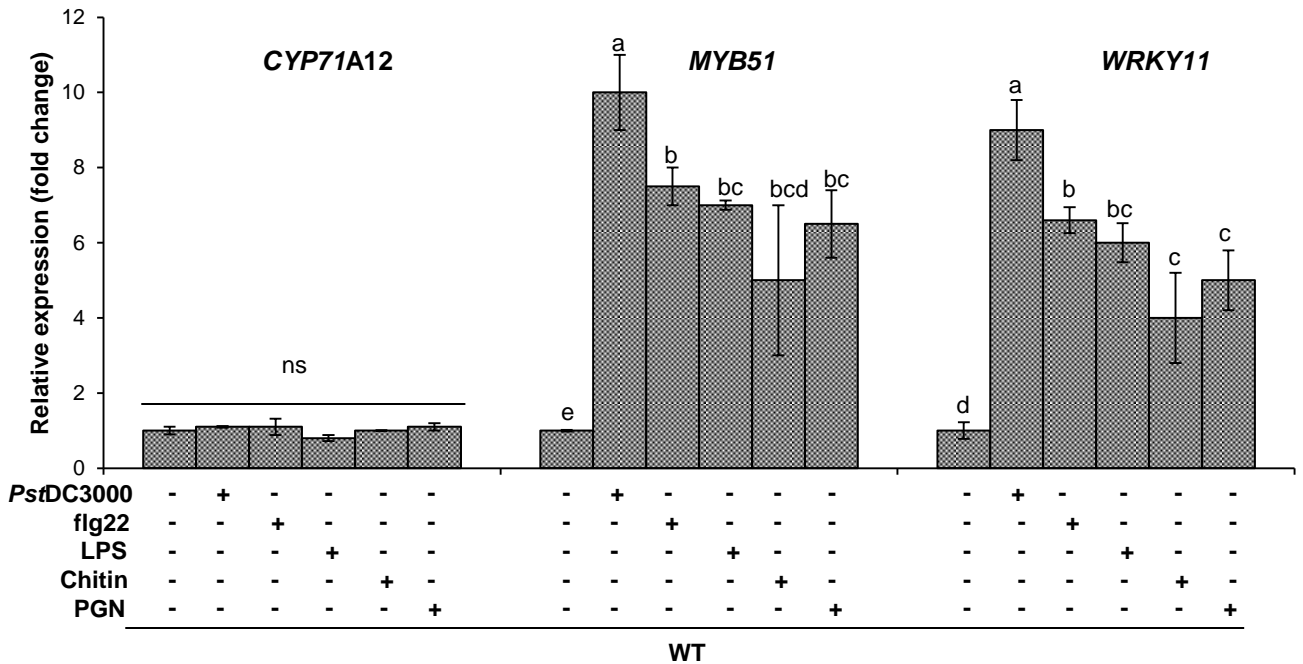

**Supplementary Figure 2: (A)** Three-week-old *in vitro* grown transgenic seedlings carrying *CYP71A12<sub>pro</sub>::GUS*, *MYB51<sub>pro</sub>::GUS*, and *WRKY11<sub>pro</sub>::GUS* promoter were foliar sprayed with flg22 (1  $\mu$ M), LPS (500  $\mu$ g mL<sup>-1</sup>), chitin (500  $\mu$ g mL<sup>-1</sup>), PGN (500  $\mu$ g mL<sup>-1</sup>), an equal volume of water (mock control), or *PstDC3000* (OD<sub>600</sub>=0.1). GUS staining of treated leaf was performed 24 h post-treatment. Scale bars: 4 mm, common to all panels. **(B)** Measurement of *ALMT1* expression in the roots of WT plants after foliar spraying with flg22 (1  $\mu$ M), LPS (500  $\mu$ g mL<sup>-1</sup>), chitin (500  $\mu$ g mL<sup>-1</sup>), PGN (500  $\mu$ g mL<sup>-1</sup>), or an equal volume of water (mock control) or *PstDC3000* (OD<sub>600</sub>=0.1). Total RNA was isolated and semi-quantitative RT-PCR performed. Lower case letters indicate the statistical significance among different treatments according to DMRT at  $p \leq 0.05$ , ( $SE$  values are three technical replicates of one experiment, repeated twice with similar results).

**SOM Fig. 3**  
**Lakshmanan et al., 2012**

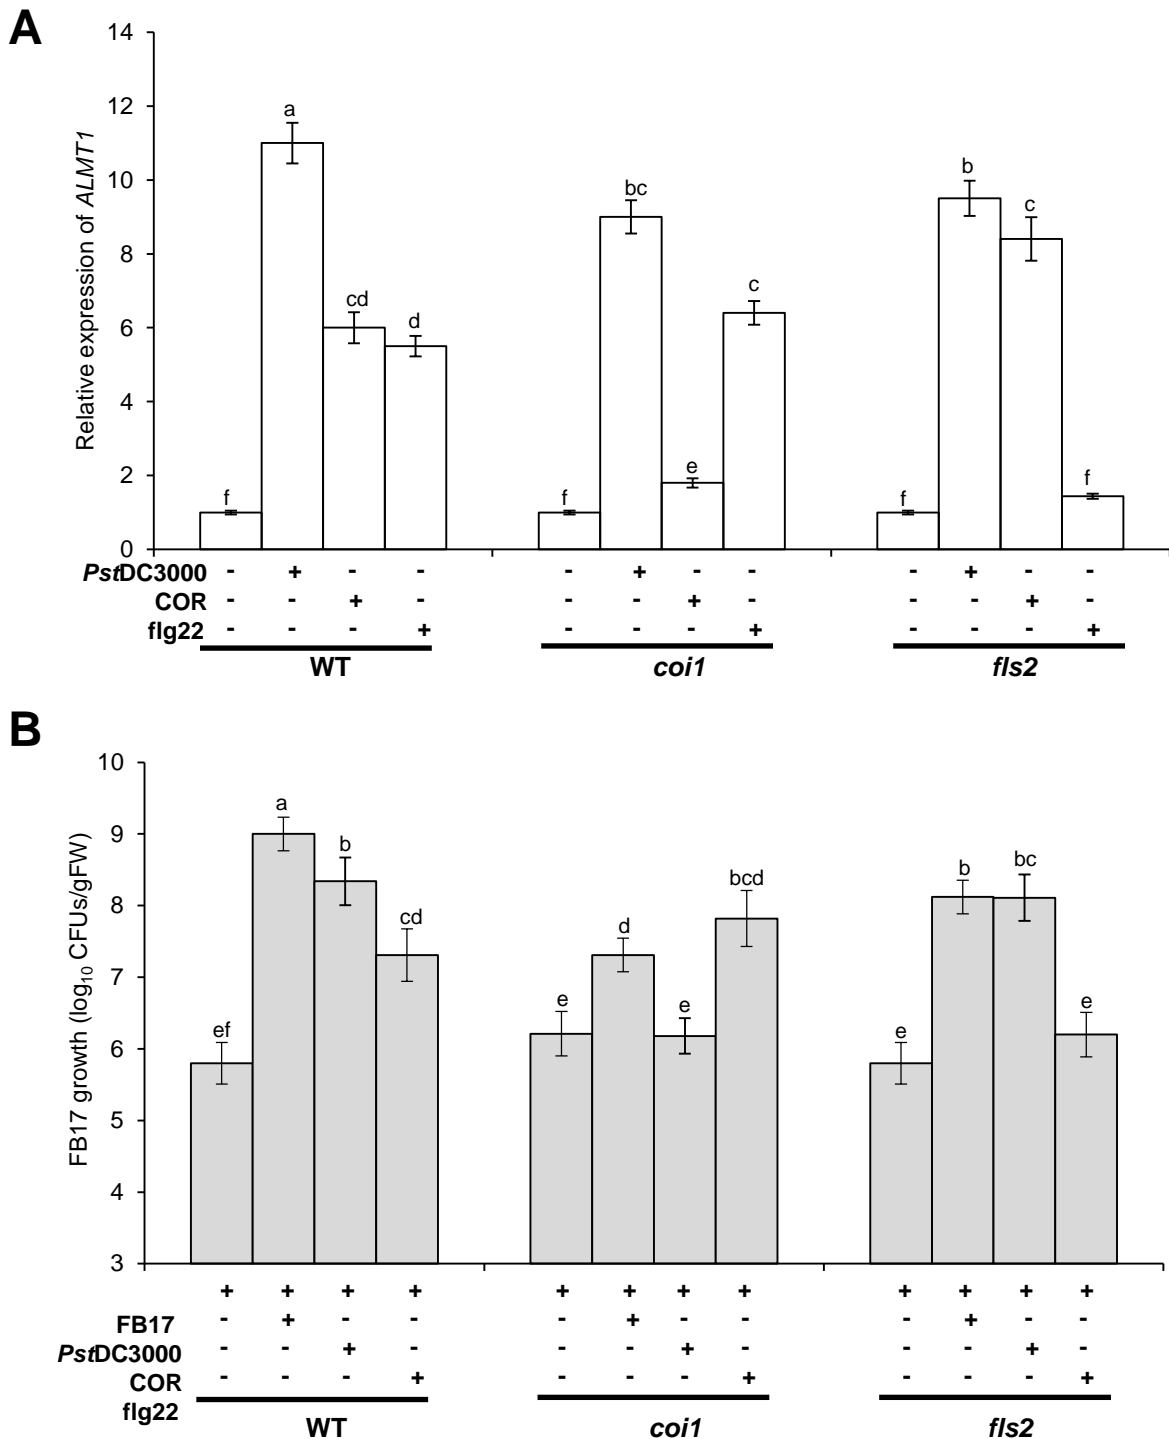

**Supplementary Figure 3: (A)** Measurement of *ALMT1* expression by semi-quantitative RT-PCR in WT and mutant's *fls2* and *coi1*. Three-week-old WT, *coi1* and *fls2* plants were foliar sprayed with flg22 (1  $\mu$ M), COR (5  $\mu$ M) or *PstDC3000* ( $OD_{600}=0.1$ ), an equal volume of water as control and incubated for 24 h. The total root RNA was isolated and was subsequently analyzed for relative expression level of *ALMT1*. **(B)** FB17 growth quantification in the roots by CFUs in WT and mutant's *fls2* and *coi1*. Three-week-old pellet-grown plants of WT, *coi1* and *fls2* were foliar sprayed with flg22 (1  $\mu$ M), COR (5  $\mu$ M), *PstDC3000* ( $OD_{600}=0.1$ ), or an equal volume of water (mock control) and then rhizo-inoculated with 4 mL of FB17 ( $OD_{600}=0.5$ ) and incubated for 72 h. FB17 growth was quantified as CFUs by serial dilution method. For both panels, data presented as mean  $\pm$  SE. The lower case letters represent statistical difference at  $p \leq 0.05$  according to DMRT, ( $SE$  values are three technical replicates of one experiment, repeated twice with similar results).

**SOM Fig. 4**  
**Lakshmanan et al., 2012**

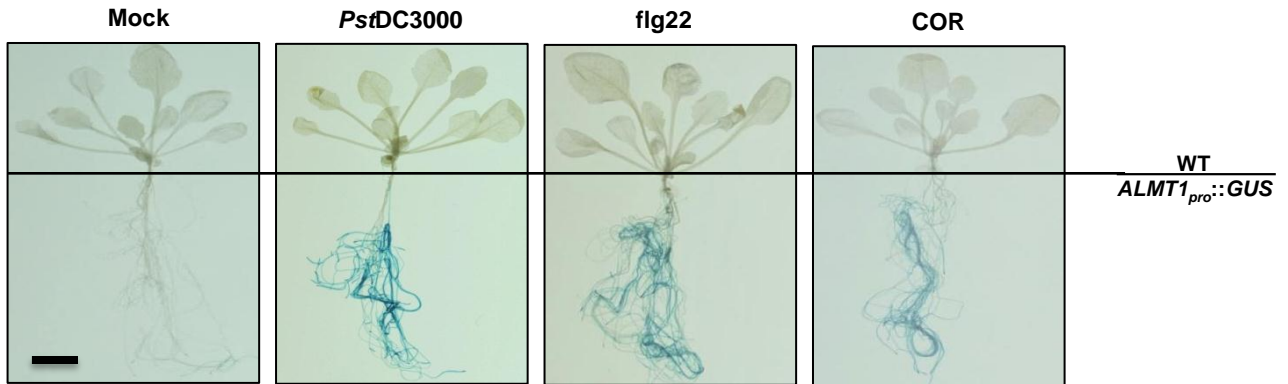

**Supplementary Figure 4:** Two-weeks-old micrografts post maturation were transferred to liquid medium for 4 d and foliar sprayed with flg22 (1  $\mu$ M), COR (5  $\mu$ M) or *PstDC3000* (OD<sub>600</sub>=0.1). Plants incubated for 24 h were subjected to GUS staining. The images are a representative sample of six plants. Scale bars: 4 mm, common to all panels. Graft notation is WT/*ALMT1<sub>pro</sub>::GUS*, where WT is scion and *ALMT1<sub>pro</sub>::GUS* is rootstock.

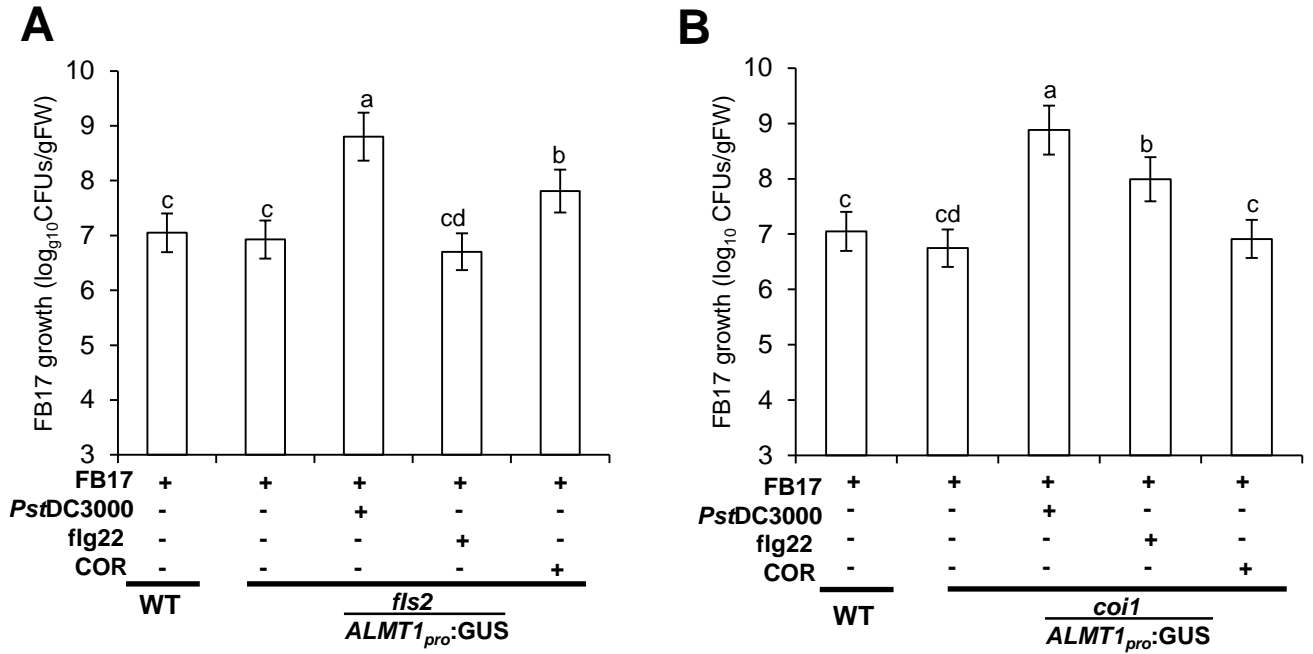

**Supplementary Figure 5: (A and B)** FB17 growth quantification on the roots by colony forming units (CFUs). Micrografts *fls2*/ALMT1<sub>pro</sub>:GUS and *coi1*/ALMT1<sub>pro</sub>:GUS foliar sprayed with flg22 (1 μM), COR (5 μM), *PstDC3000* (OD<sub>600</sub>=0.1), an equal volume of water (mock control) and then rhizo-inoculated with FB17 (OD<sub>600</sub>=0.5) of 4mL/pellet, and incubated for 72 h. Graft notation is *fls2*/ALMT1<sub>pro</sub>:GUS, where *fls2* is scion and ALMT1<sub>pro</sub>:GUS is rootstock and for *coi1*/ALMT1<sub>pro</sub>:GUS, where *coi1* is scion and ALMT1<sub>pro</sub>:GUS is rootstock. Lower case letters indicate the statistical significance among different treatments according to DMRT at  $p \leq 0.05$ , (SE values are 12 technical replicates of one experiment).

**A**

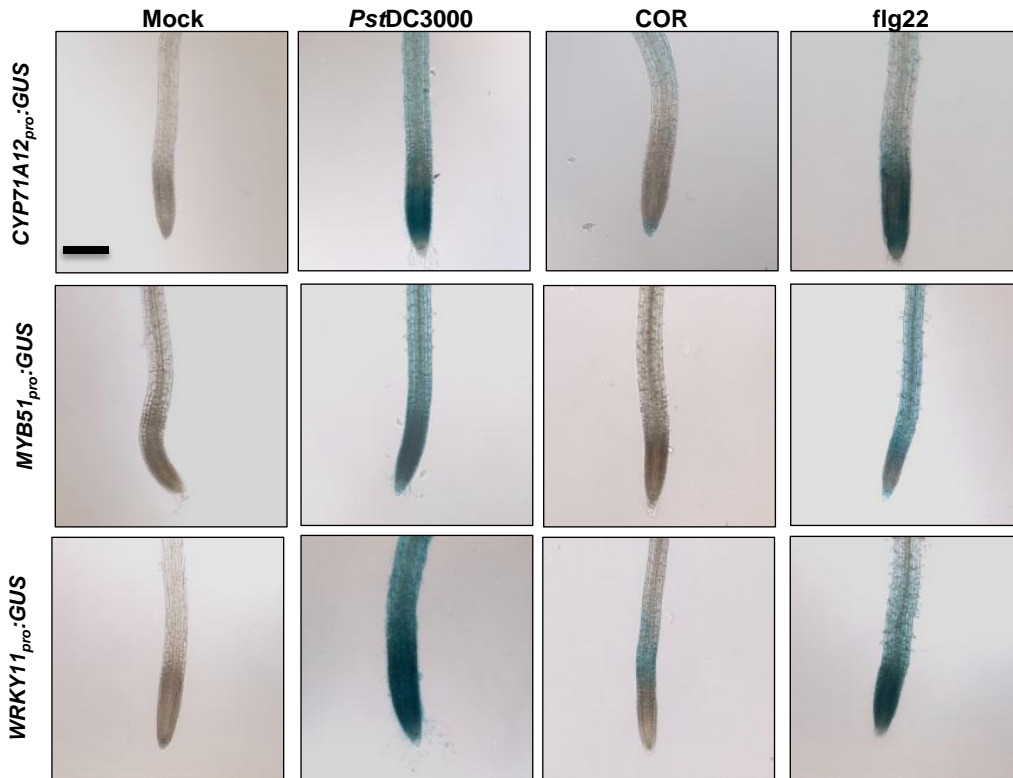

**B**

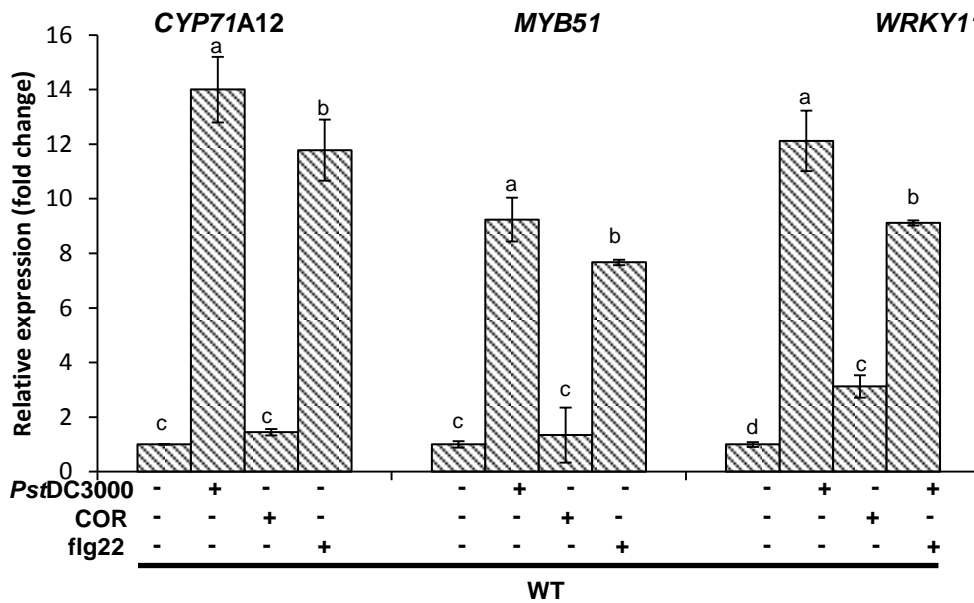

**Supplementary Figure 6: (A)** Transgenic seedlings carrying a *CYP71A12<sub>pro</sub>:GUS*, *MYB51<sub>pro</sub>:GUS*, and *WRKY11<sub>pro</sub>:GUS* reporter construct in WT background were grown *in vitro* and treated with flg22 (1  $\mu$ M), COR (5  $\mu$ M), *PstDC3000* (OD<sub>600</sub>=0.1), with equal volume of water (mock control). Plants were incubated for 24 h before GUS staining. Scale bars: 50  $\mu$ m, common to all panels. **(B)** Measurement of *CYP71A12*, *MYB51*, *WRKY11* expression in WT plants treated with flg22 (1  $\mu$ M), COR (5  $\mu$ M), *PstDC3000* (OD<sub>600</sub>=0.1) or equal volume of water (mock control). Total RNA was collected from roots after 24 h of incubation. sqRT-PCR was performed and relative expression of *CYP71A12*, *MYB51* and *WRKY11* was quantified. Data represents the mean  $\pm$  SE. The lower case letters represent statistical difference at  $p \leq 0.05$  according to DMRT ( $SE$  values are three technical replicates of one experiment, repeated twice with similar results).

SOM Fig. 7  
Lakshmanan et al., 2012

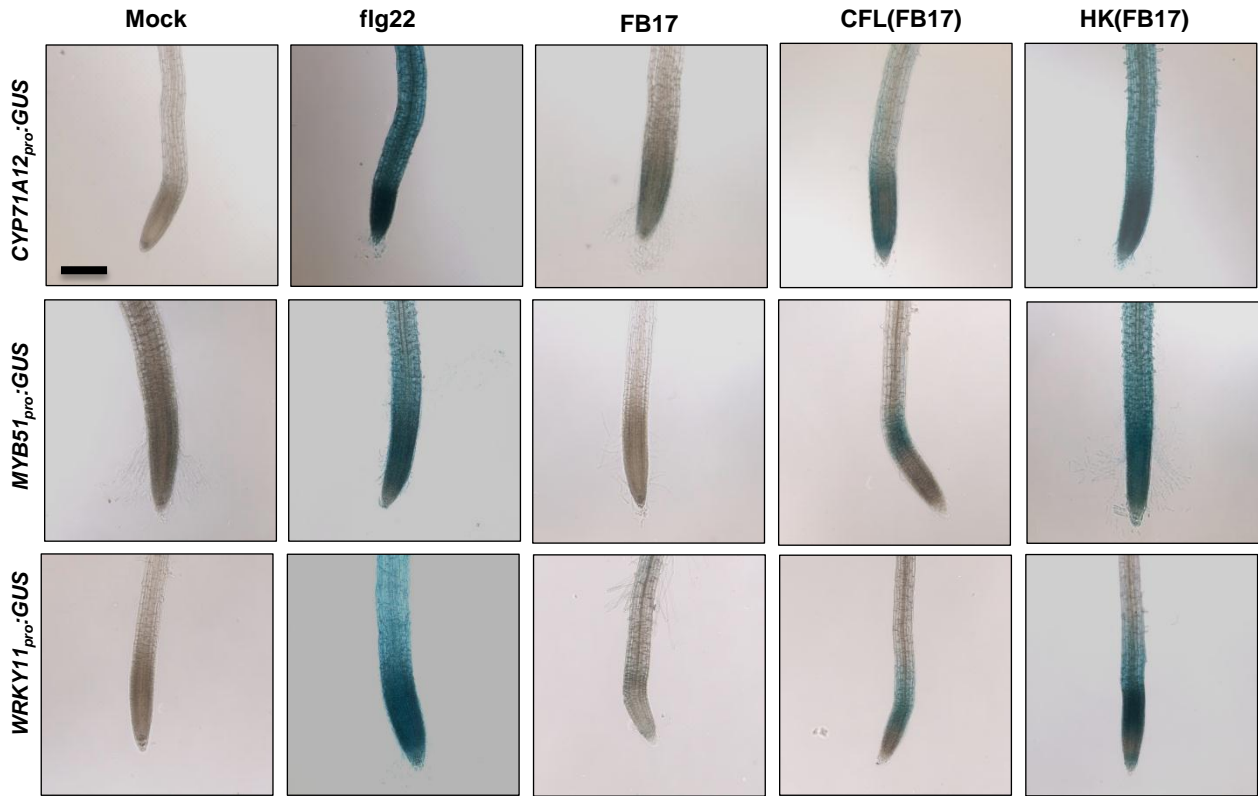

**Supplementary Figure 7:** Transgenic seedlings carrying a *CYP71A12<sub>pro</sub>:GUS*, *MYB51<sub>pro</sub>:GUS*, or *WRKY11<sub>pro</sub>:GUS* reporter construct in WT background were grown *in vitro* and co-treated with flg22 (1  $\mu$ M) + FB17 (OD<sub>600</sub>=0.001), flg22 (1  $\mu$ M) + culture-free lysate (CFL) from FB17 and flg22 (1  $\mu$ M) + heat killed FB17 and incubated for 24 h before GUS staining. Scale bars: 4mm, common to all panels.

**A**

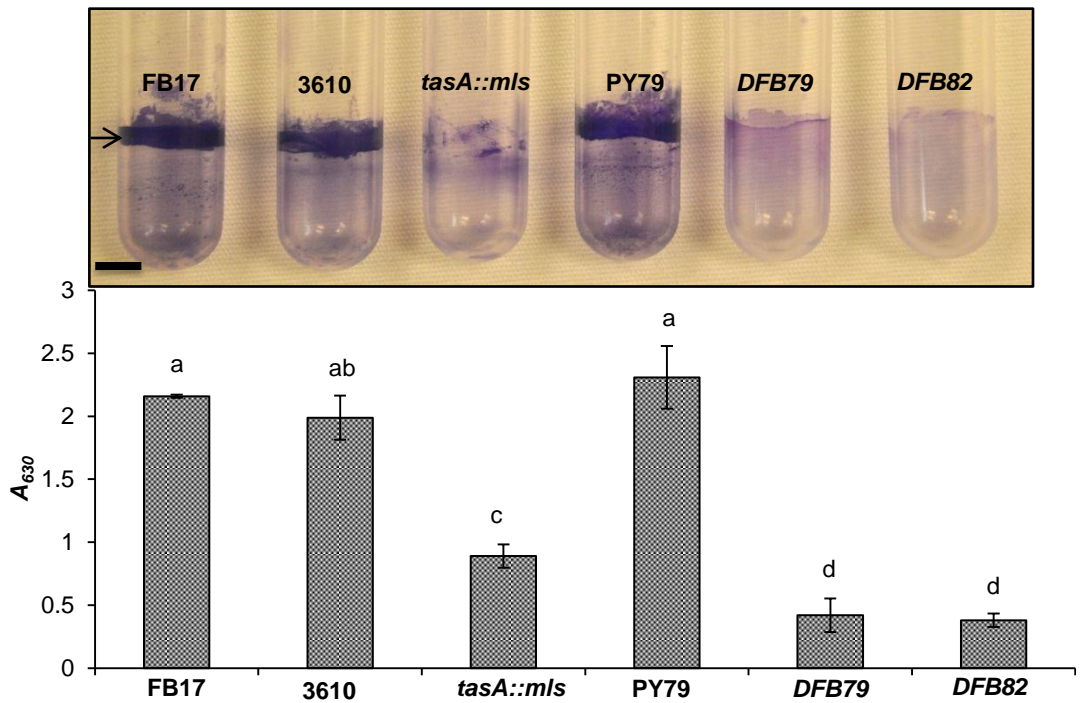

**B**

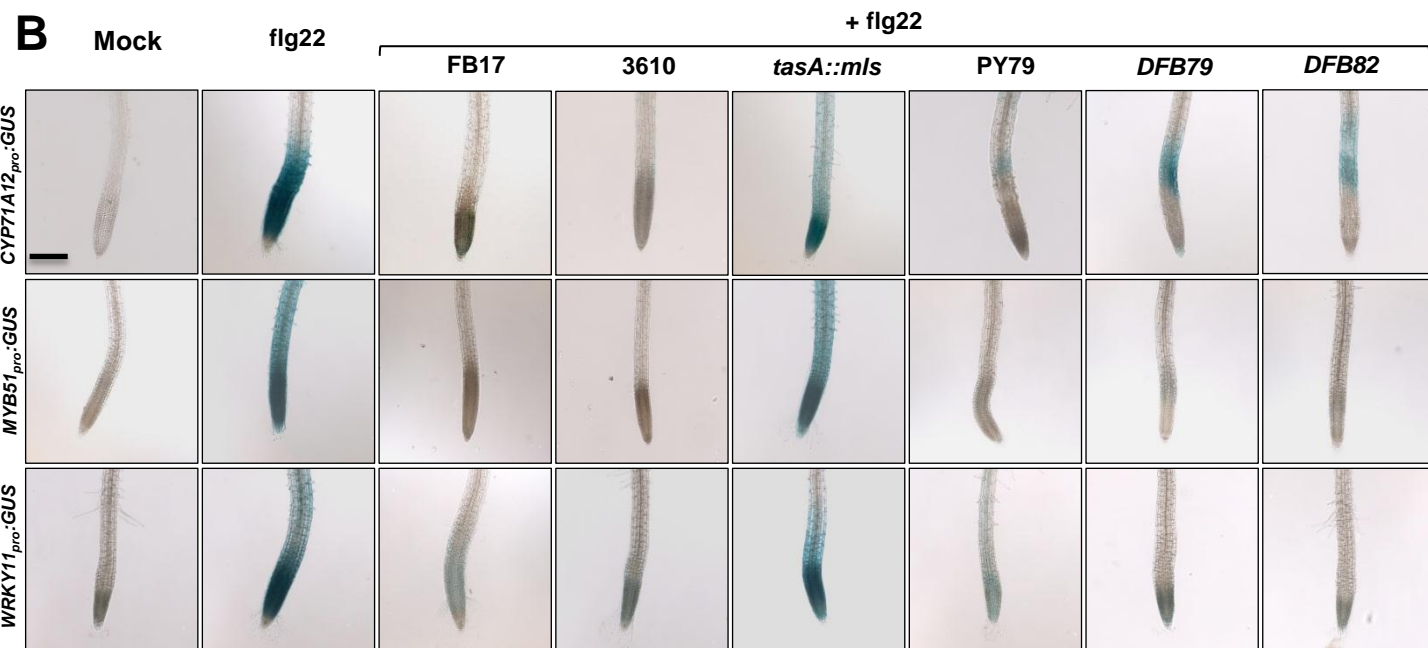

**Supplementary Figure 8: (A)** Evaluation of surface attachment properties on solid surface by FB17, 3610 wild-type, *tasA::mIs* mutant, PY79 wild type, biofilm deficient mutants *DFB79*, and *DFB82* strains. OD<sub>630</sub> of solubilized crystal violet (CV) from tube assays over time for tested *B. subtilis* strains. Data presented as mean ± SE. The lower case letters represent statistical difference at  $p \leq 0.05$  according to DMRT ( $SE$  values are three technical replicates of one experiment, repeated twice with similar results). Insert: Photograph of surface attachment of different strains of *Bacillus*.

**(B)** Transgenic seedlings carrying *CYP71A12<sub>pro</sub>::GUS*, *MYB51<sub>pro</sub>::GUS* or *WRKY11<sub>pro</sub>::GUS* reporter construct in WT background were grown *in vitro* and simultaneously treated with flg22 (1  $\mu$ M) + FB17 (OD<sub>600</sub>=0.001), 3610, PY79, *DFB79*, *DFB82* or an equal volume of water (mock control) and incubated for 24 h before GUS staining. Scale bars: 50 $\mu$ m, common to all panels.



**SOM Fig. 9**  
**Lakshmanan et al., 2012**

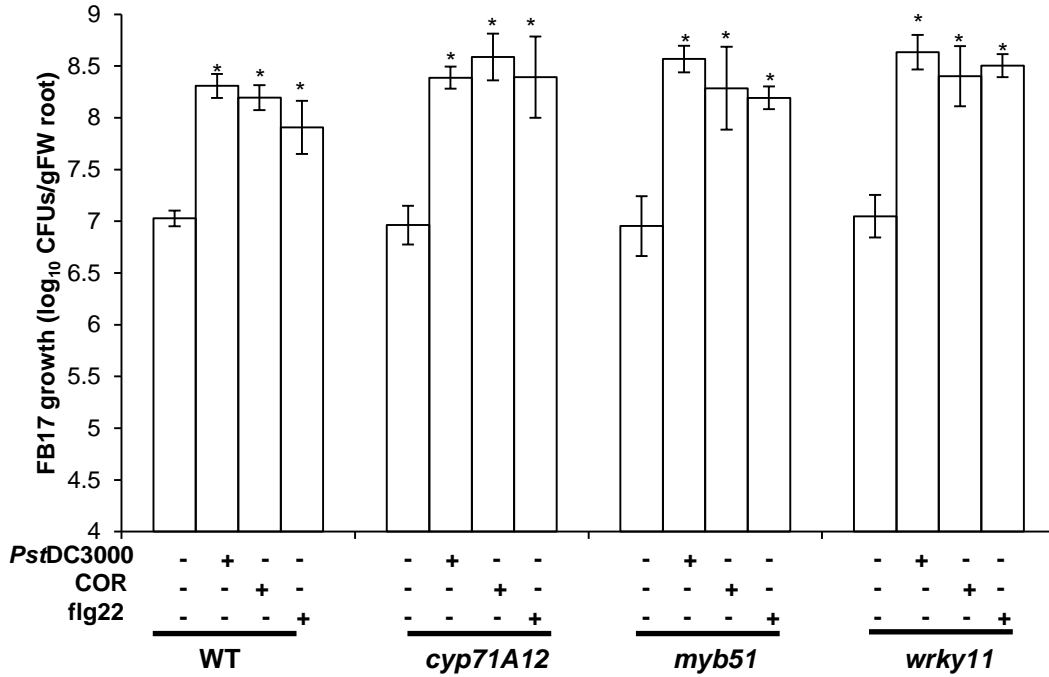

**Supplementary Figure 9:** Three-week-old *cyp71A12*, *myb5*, *wrky11*, and WT were foliar sprayed with flg22 (1  $\mu$ M), COR (5  $\mu$ M), or *PstDC3000* ( $OD_{600}=0.1$ ) and the rhizo-inoculated with 4 ml/pellet, with FB17 ( $OD_{600}=0.5$ ) or an equal volume of water (mock control) and FB17 growth was quantified by CFUs after 72 h. Data represents the mean  $\pm$  SE. The lower case letters represent statistical difference at  $p \leq 0.05$  according to DMRT,  $SE$  values are from 24 independent measurements from two experiments.

SOM Fig. 10  
Lakshmanan et al., 2012

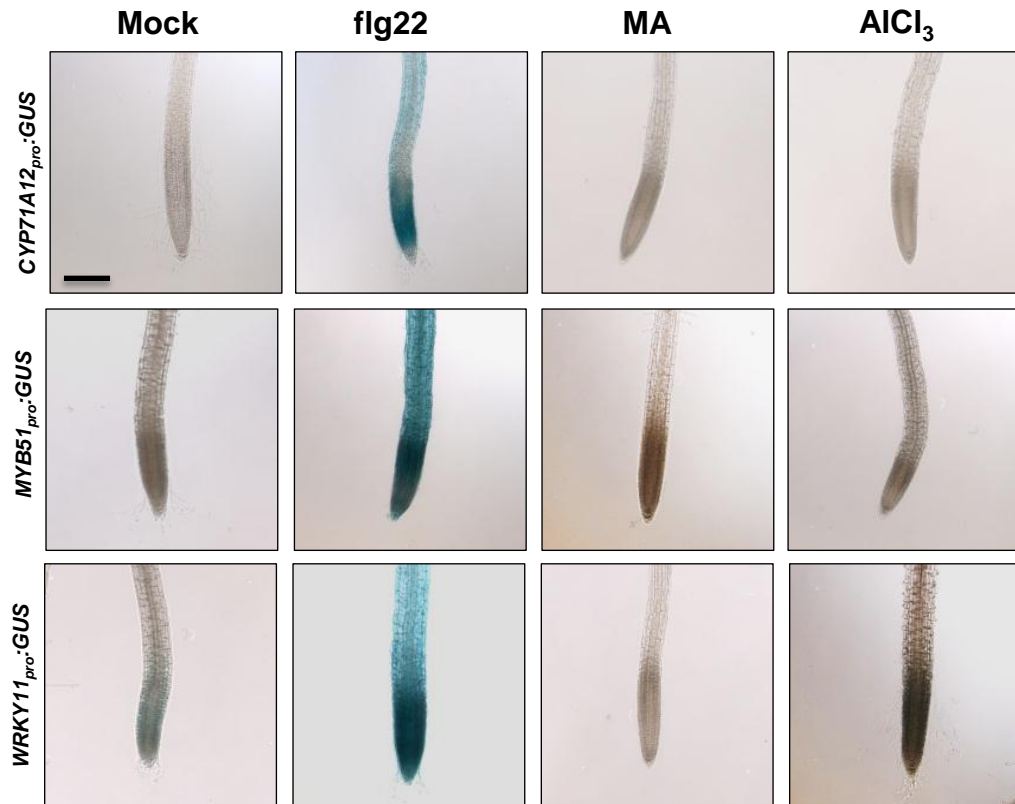

**Supplementary Figure 10:** Transgenic seedlings carrying a *CYP71A12<sub>pro</sub>:GUS*, *MYB51<sub>pro</sub>:GUS*, or *WRKY11<sub>pro</sub>:GUS* reporter construct in WT background were grown *in vitro* and co-treated with flg22 (1  $\mu$ M), malic acid (MA) (100 nM), AlCl<sub>3</sub> (4  $\mu$ M) or an equal volume of water (mock control) and incubated for 24 h before GUS staining. Scale bars: 50 $\mu$ m, common to all panels.

**SOM Fig. 11**  
**Lakshmanan et al., 2012**

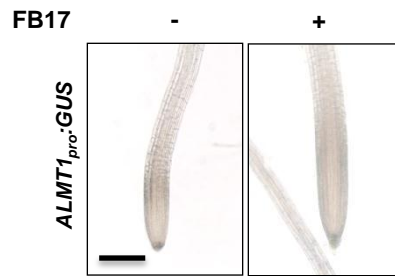

**Supplementary Figure 11:** Transgenic seedlings carrying *ALMT1<sub>pro</sub>:GUS* reporter construct in WT background were grown *in vitro* and root-treated with FB17 ( $OD_{600}=0.001$ ) for 24 h before GUS staining. Scale bars: 50 $\mu$ m, common to both the panels.

**SOM Fig. 12**  
**Lakshmanan et al., 2012**

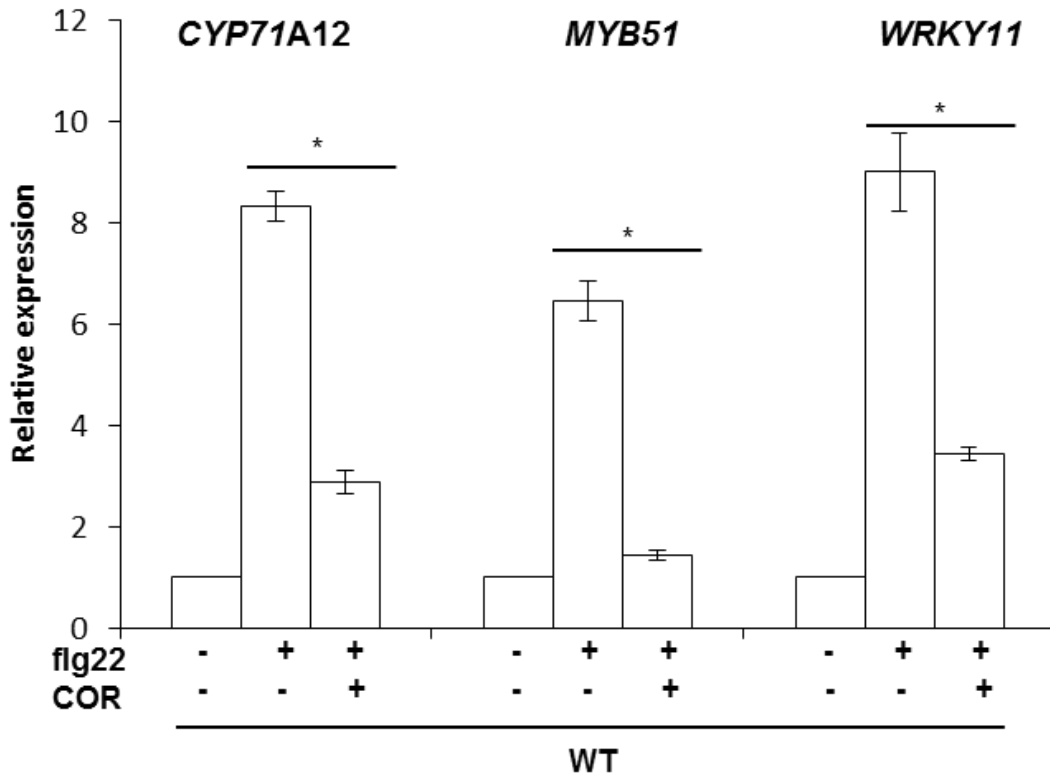

**Supplementary Figure 12:** Expression analyses of root defense genes post aerial application of COR (5  $\mu$ M) and Flg22 (1 $\mu$ M). The results represented as Mean  $\pm$  SE. \*  $p \leq 0.05$ , two tailed 't' test. (SE values are three technical replicates of one experiment, repeated twice with similar results).
